# Supplementary material
Source: PubMed Central journal article supplement (PMC4273981)
Supplement: cb500740d_si_001.pdf [file cb500740d_si_001.pdf]

**Identification of small molecules that protect pancreatic  $\beta$  cells against endoplasmic reticulum stress-induced cell death**

Kim Tran<sup>†</sup>, Yu Li<sup>†</sup>, Hongliang Duan<sup>†</sup>, Daleep Arora<sup>†</sup>, Hui-Ying Lim<sup>§</sup>, and Weidong Wang<sup>†\*</sup>

<sup>†</sup>Immunobiology and Cancer Research Program, <sup>§</sup>Free Radical Biology and Aging Program,  
Oklahoma Medical Research Foundation, Oklahoma, United States of America

\*Corresponding author

**Supplementary Figure 1. Hit compounds do not increase  $\beta$  cell ATP levels by inducing cell proliferation.**

$\beta$ TC6 cells were treated with the indicated concentrations of compounds for 7 days. Compounds were added on day 1 and again on day 4. Total ATP levels were measured after 7 days as a surrogate for cell number.

**Supplemental Figure 2: Hit compounds protect human  $\beta$  cells against ER stress-induced death.**

TUNEL staining in primary human islets. Primary human islets were treated with 0.75  $\mu$ g/mL Tm and 20  $\mu$ M of the indicated compounds for 72 h before TUNEL staining. Anti-insulin antibody was used to mark insulin<sup>+</sup>  $\beta$  cells, and DAPI as nuclear marker. Tm treatment induced TUNEL staining, which was mitigated or abolished by hit compound treatment.

**Supplementary Figure 3. Known modulators of ER stress do not protect  $\beta$  cells against ER stress.**

$\beta$ TC6 cells were treated with 0.35  $\mu$ g/mL of Tm and the indicated concentrations of seven known ER stress modulators (salubrinal, guanabenz acetate, STF083010, PP1 Analog II, kaempferol, quercetin, and apigenin) in ten 2-fold serial points at concentrations of from 0.007 to 100  $\mu$ M for 72 h before measurement of cellular ATP levels.

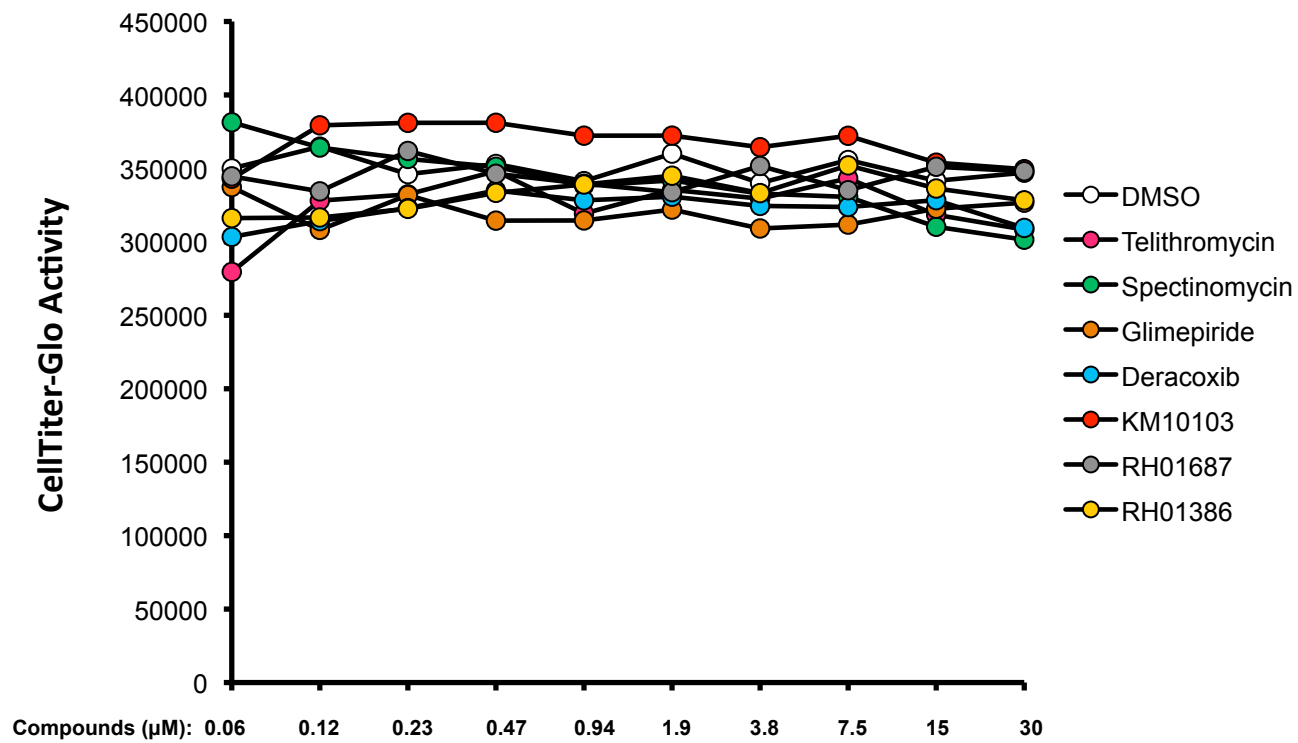

**Supplemental Figure 1**

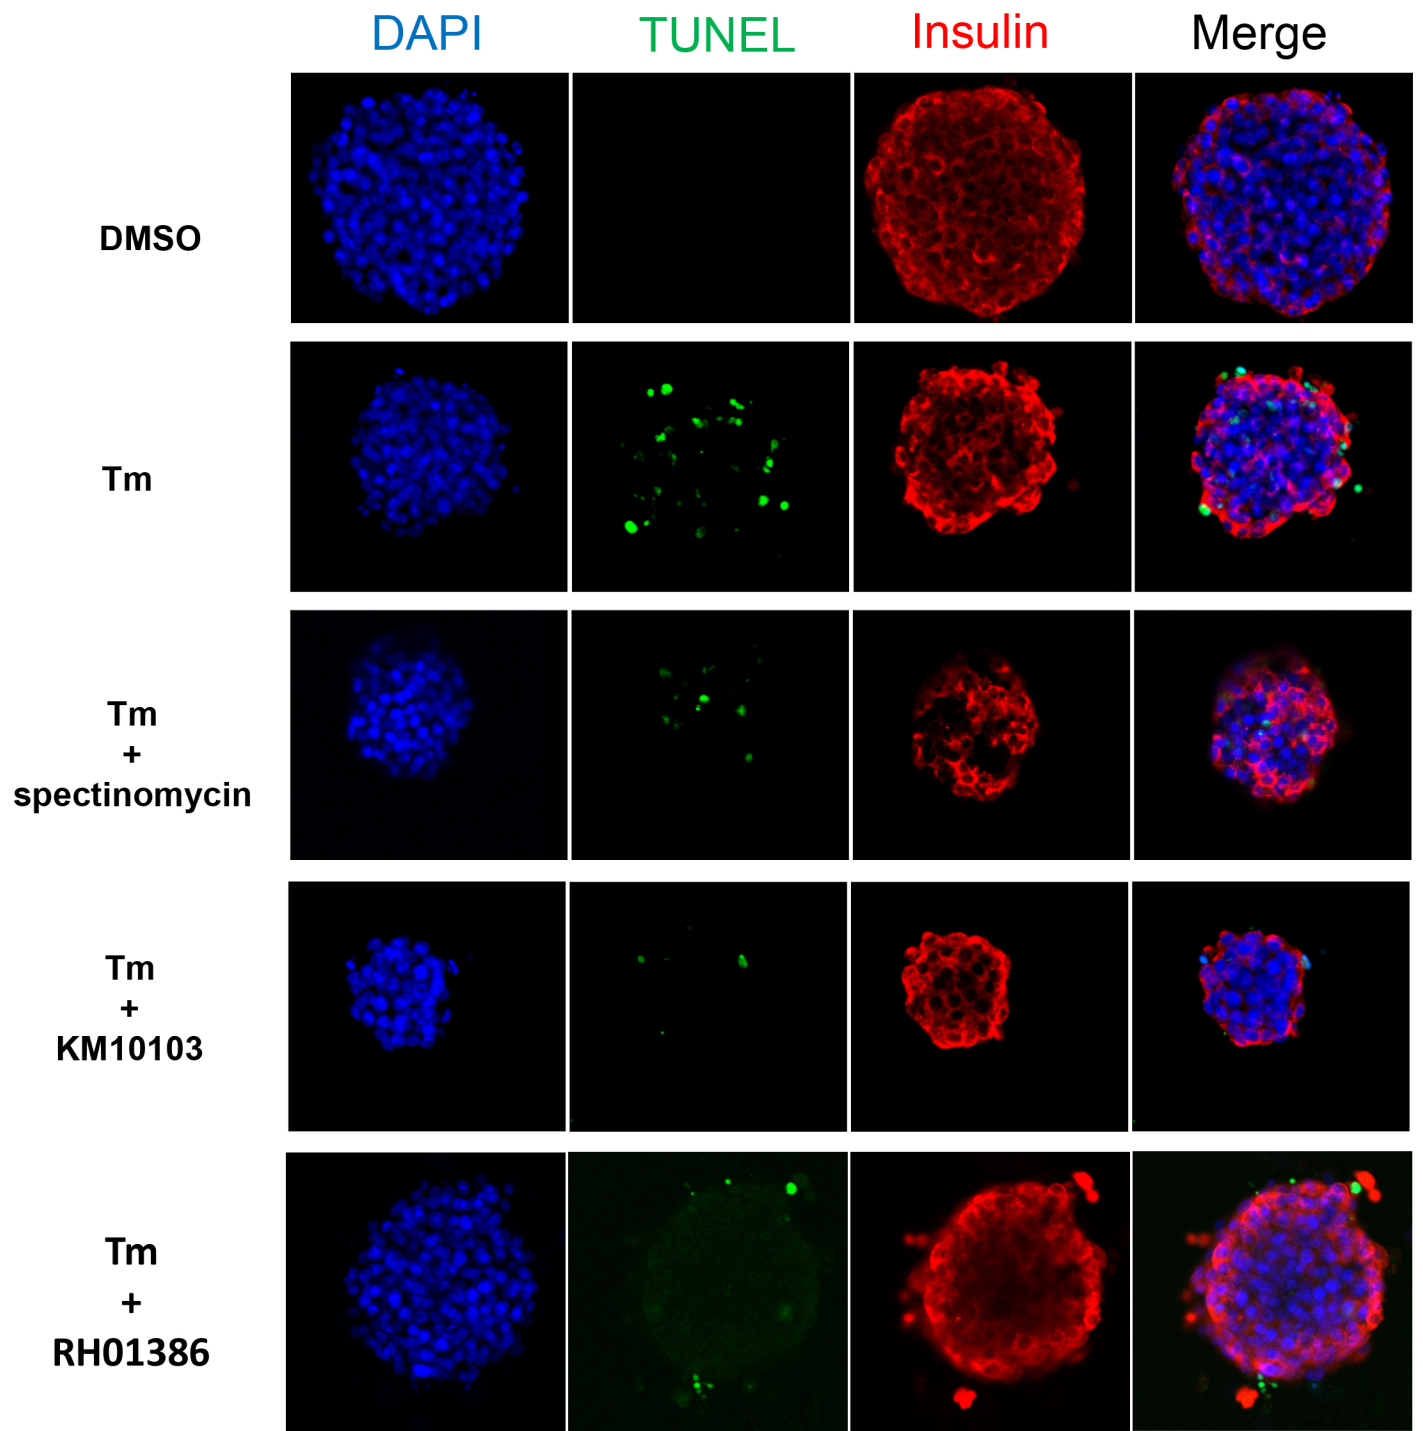

Supplemental Figure 2

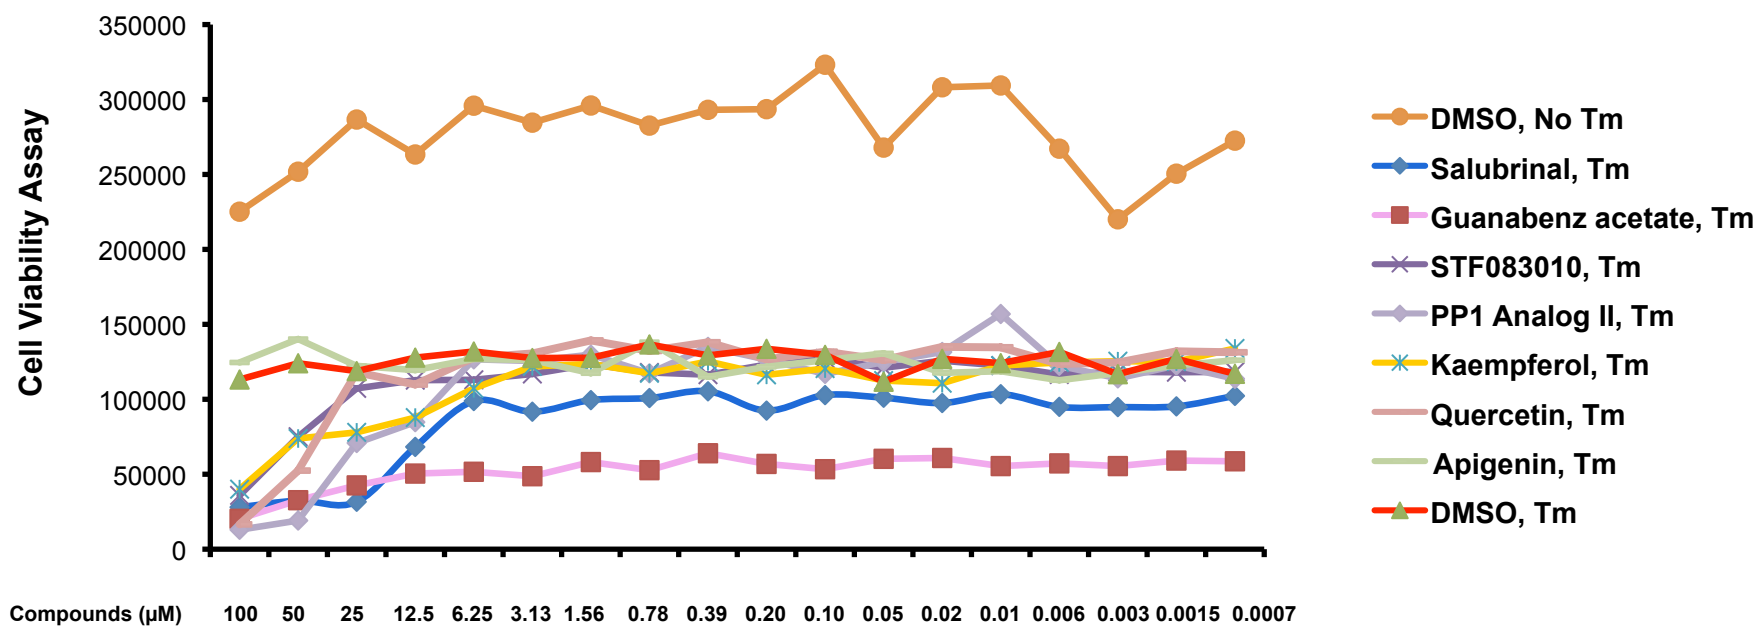

Supplemental Figure 3
